# Supplementary material
Source: MDPI journal article supplement (https://www.mdpi.com/2075-4701/8/4/289)
Supplement: s1 [file s1]

**Supporting Information**

**Surface nitridation of aluminum nanoparticles by off-line operation and its kinetics analysis**

Yong Yi1, Dai Li1, Daichuan Ma2, Daibing Luo2*, Weizhong Yang3, Wangjing Ma4

1 School of Materials Science and Engineering, Southwest University of Science and Technology, Mianyang 621010, China

2 Analytical & Testing Center, Sichuan University, Chengdu 610064, China

3 College of Materials Science and Engineering, Sichuan University, Chengdu 610064, China

4 Technical Institute of Physics and Chemistry, Chinese Academy of Sciences, Beijing 100190, China

Correspondence: [luodb@scu.edu.cn](mailto:luodb@scu.edu.cn); Tel: +86-28-85412949

1. The stability and anti-oxidation of the products estimated by XRD characterization after placed in ambient condition for 1h. There are almost no changes in the XRD curves since no new peaks appear and no old peaks disappear, which indicate the AlN coatings could prevent the coated metal cores from oxidation in air.

**
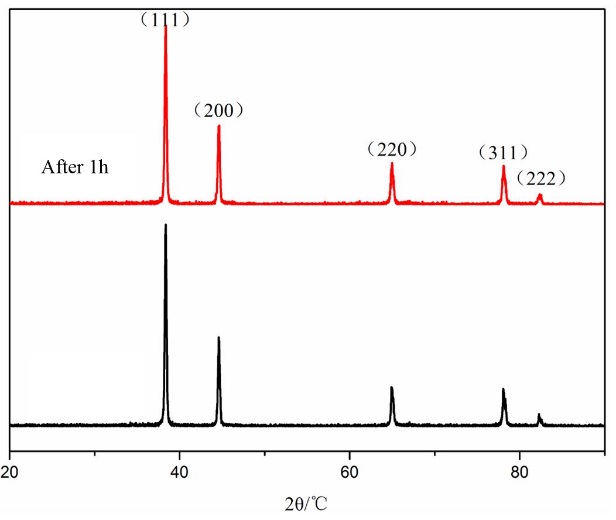
**

Figure S1. XRD of the nitridation-treatment sample (600oC) after placement in air for 1h.

1. The data needed for the *Ea* calculations were accumulated from the DSC curves and are summarized in Table S1.

**Table S1.** Reactivity parameters obtained from the TG measurements for the surface nitridation calculation.

| α | T/K | | | |
| --- | --- | --- | --- | --- |
| β= 5 K·min-1 | β= 7 K·min-1 | β= 8 K·min-1 | β= 9 K·min-1 |
| 0.02 | 633.3 | 669.5 | 640.9 | 642.8 |
| 0.04 | 681.5 | 719 | 693.6 | 708 |
| 0.06 | 719.3 | 750.5 | 731.9 | 749.8 |
| 0.08 | 744.9 | 769.6 | 756.8 | 773.3 |
| 0.10 | 762.4 | 783.5 | 774 | 789.7 |
| 0.12 | 775.0 | 794.7 | 787.5 | 803.5 |
| 0.14 | 785.3 | 804.8 | 798.5 | 816.2 |
| 0.16 | 794.2 | 814.2 | 809.5 | 828.2 |
| 0.18 | 802.5 | 823.3 | 819.3 | 839.7 |
| 0.20 | 810.5 | 831.8 | 828.7 | 850.3 |
| 0.22 | 818.1 | 840.2 | 837.9 | 859.3 |
| 0.24 | 825.5 | 847.9 | 846.5 | 867.4 |
| 0.26 | 832.7 | 855.3 | 854.5 | 874.3 |
| 0.28 | 839.5 | 861.8 | 861.9 | 879.8 |
| 0.30 | 846.1 | 867.7 | 868.5 | 884.3 |
| 0.32 | 852.3 | 872.6 | 874 | 887.9 |
| 0.34 | 857.9 | 876.8 | 878.7 | 891 |
| 0.36 | 862.9 | 880.3 | 882.6 | 893.9 |
| 0.38 | 867.3 | 883.4 | 886 | 896.5 |
| 0.40 | 871.2 | 886.3 | 889 | 899.3 |
| 0.42 | 874.6 | 889.1 | 891.8 | 902 |
| 0.44 | 877.7 | 891.9 | 894.7 | 904.8 |
| 0.46 | 880.7 | 894.6 | 897.7 | 907.6 |
| 0.48 | 883.4 | 896.8 | 900.6 | 910.2 |
| 0.50 | 885.8 | 898.8 | 903.5 | 912.5 |
| 0.52 | 887.6 | 900.2 | 905.9 | 914.4 |
| 0.54 | 889 | 901.3 | 908 | 915.9 |
| 0.56 | 890.3 | 902.2 | 909.6 | 917.1 |
| 0.58 | 891.5 | 903.1 | 910.9 | 918.1 |
| 0.60 | 892.7 | 903.9 | 912 | 919.1 |
| 0.62 | 893.8 | 904.6 | 913 | 919.8 |
| 0.64 | 895.3 | 905.5 | 914 | 920.6 |
| 0.66 | 897.1 | 906.5 | 915 | 921.3 |
| 0.68 | 899.8 | 908.1 | 916.3 | 922.2 |
| 0.70 | 903.2 | 910.3 | 917.9 | 923.2 |
| 0.72 | 906.9 | 913.3 | 920 | 924.3 |
| 0.74 | 911.1 | 916.4 | 922.7 | 925.8 |
| 0.76 | 915.7 | 920 | 926 | 927.7 |
| 0.78 | 920.8 | 924 | 929.6 | 930.3 |
| 0.80 | 926.5 | 928.4 | 933.4 | 933.5 |
| 0.82 | 932.3 | 933.3 | 937.3 | 937.1 |
| 0.84 | 937.9 | 938.2 | 941.3 | 940.8 |
| 0.86 | 943.1 | 943.1 | 945.2 | 944.6 |
| 0.88 | 947.6 | 947.4 | 949 | 948.3 |
| 0.90 | 951.8 | 951.5 | 952.6 | 951.9 |
| 0.92 | 955.7 | 955.3 | 956.1 | 955.4 |
| 0.94 | 959.5 | 959 | 959.5 | 958.9 |
| 0.96 | 963.3 | 962.5 | 962.8 | 962.3 |
| 0.98 | 967 | 966 | 966.1 | 965.5 |
| 1.00 | 970.7 | 969.4 | 969.2 | 968.7 |
|  | TP=893 K | TP=905.4 K | TP=915.2 K | TP=922.7 K |

Note: These data are obtained based on the measurements from Figure 5.

1. *Ea* calculations by Ordinary-Integral, MacCallum-Tanner, Satava-Setak methods are according to Agrawal method.

Equation: Log(G(α)) = lg*AE*/*Rβ*-2.315-0.4567*E*/*RT*







(b)

(a)







(d)

(c)

Figure S2. *Ea* calculation by Agrawal method. Scatter plots and linear regression curves of 1/*T*-Lg(G(*α*)) at (a) 5, (b) 7, (c) 8, and (d) 9oC·min-1 heating rate, respectively.
